# Supplementary material for: Identification and Antimicrobial Activity of Medium-Sized and Short Peptides from Yellowfin Tuna (Thunnus albacares) Simulated Gastrointestinal Digestion
Source: PubMed Central journal article supplement (PMC7555217; doi:10.3390/foods9091185), 2020-08-27
Supplement: foods-09-01185-s001.pdf [file foods-09-01185-s001.pdf]

## Supplementary Material

### Identification and antimicrobial activity of medium-sized and short peptides from yellowfin tuna (*Thunnus albacares*) simulated gastrointestinal digestion

Andrea Cerrato<sup>1</sup>, Anna Laura Capriotti<sup>1</sup>, Federico Capuano<sup>2</sup>, Chiara Cavaliere<sup>1</sup>, Angela Michela Immacolata Montone<sup>2,3</sup>, Carmela Maria Montone<sup>1\*</sup>, Susy Piovesana<sup>1</sup>, Riccardo Zenezini Chiozzi<sup>4</sup>, and Aldo Laganà<sup>1,5</sup>

<sup>1</sup>Department of Chemistry, Università di Roma “La Sapienza”, Piazzale Aldo Moro 5, 00185 Rome, Italy

<sup>2</sup>Istituto Zooprofilattico Sperimentale del Mezzogiorno, Via Salute 2 Portici (NA)

<sup>3</sup>Department of Industrial Engineering, Università degli Studi di Salerno, Via Giovanni Paolo II, 132 I-84084 Fisciano (SA), Italy

<sup>4</sup>Biomolecular Mass Spectrometry and Proteomics, Bijvoet Center for Biomolecular Research, Utrecht Institute for Pharmaceutical Sciences, Utrecht University, Padualaan 8, Utrecht, 3584 CH, Netherlands

<sup>5</sup>CNR NANOTEC, Campus Ecotekne, University of Salento, Via Monteroni, 73100 Lecce, Italy

\*Corresponding author: Carmela Maria Montone

Department of Chemistry

Università di Roma “La Sapienza”

Piazzale Aldo Moro 5

00185 Rome, Italy

E-mail: [carmela.maria@uniroma1.it](mailto:carmela.maria@uniroma1.it)

tel: +39 06 4991 3062

The ATCC bacterial strains are stored inside Microbank™ at -20 °C:

1. Defrost at room temperature, paying particular attention to the safety standards provided by class 2 laboratories
2. With a sterile loop, take a small sphere from the microbank and perform the microbiological smear on blood agar plates and incubate at 37 ° for 24 hours \*
3. Remove bacteria colonies from the bacteria plate and inoculate the tube containing the Mueller-Hinton broth 10 ml, maintain this bacterial stock culture exponentially, incubating for about 4 hours at 37 °
4. Use a densitometer McFarland DEN-1 ( 0.3 - 15.0 unit ) for obtained 0.5 unit of McFarland that corresponds roughly to  $10^8$  bacteria/mL , or It is possible use a McFarland standard that corresponds to a suspension of BaC12 prepared in H<sub>2</sub>S04 [0.05 mL of 1% BaC12 (w/v) in 9.95 mL of 10% H<sub>2</sub>S04 (v/v)] and compare the inoculum visually
5. Adjust the suspension to  $10^3$  bacteria/mL (a dilution to 1 : 10)

In order to verify the antimicrobial activity of the two extracts against the *Staphylococcus aureus* bacteria strain, two antibiotics were used as controls: Ampicillin (25 µg/mL) and Polymyxin B (400µg/mL). Data are shown in Table

| Antibiotics and extracts | Bacteria strain | UFC/mL inoculo        | MIC mg ml <sup>-1</sup> | UFC 24 h incubation    | MCB mg ml <sup>-1</sup> |
|--------------------------|-----------------|-----------------------|-------------------------|------------------------|-------------------------|
| Ampicillin               | <i>S.aureus</i> | 1,5 x 10 <sup>3</sup> | 1.5 X 10 <sup>-6</sup>  | 1,0 x 10 <sup>-1</sup> | 1.5 X 10 <sup>-6</sup>  |
| Polymixin B              |                 |                       | 2,4 x 10 <sup>-5</sup>  | 3.7 x 10 <sup>-2</sup> | 2,4 x 10 <sup>-5</sup>  |
| C18                      |                 |                       | 10,0 x 10 <sup>-1</sup> | 0                      | 10,0 x 10 <sup>-1</sup> |
| GCB                      |                 |                       | 35 x 10 <sup>-1</sup>   | 0                      | 35 x 10 <sup>-1</sup>   |
